# Supplementary material for: Association between C-reactive protein-triglyceride-glucose index and the risk of cardiovascular-kidney metabolic syndrome progression:The Kailuan Study
Source: Research Square preprint supplement (doi:10.21203/rs.3.rs-7556978/v1), 2025-10-23
Supplement: Supplementary file 1 [file ec6870795b8a04d2c7e13800.docx]

Fig S1. Kaplan–Meier survival curves for cumulative cardiovascular disease incidence by CTI index


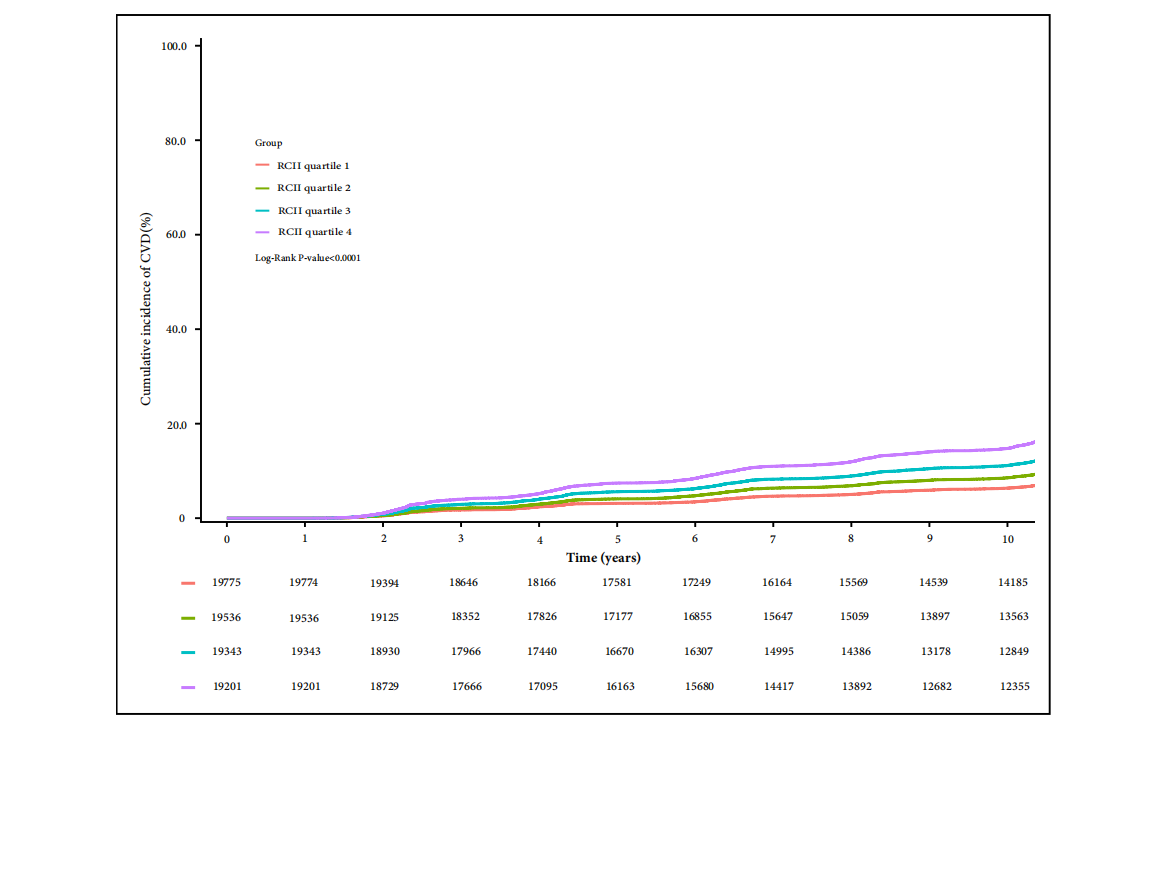


**Fig S2.Subgroup analyses of the association between theCTI index and CVD incidence in a population with CKM syndrome stages 0–3**


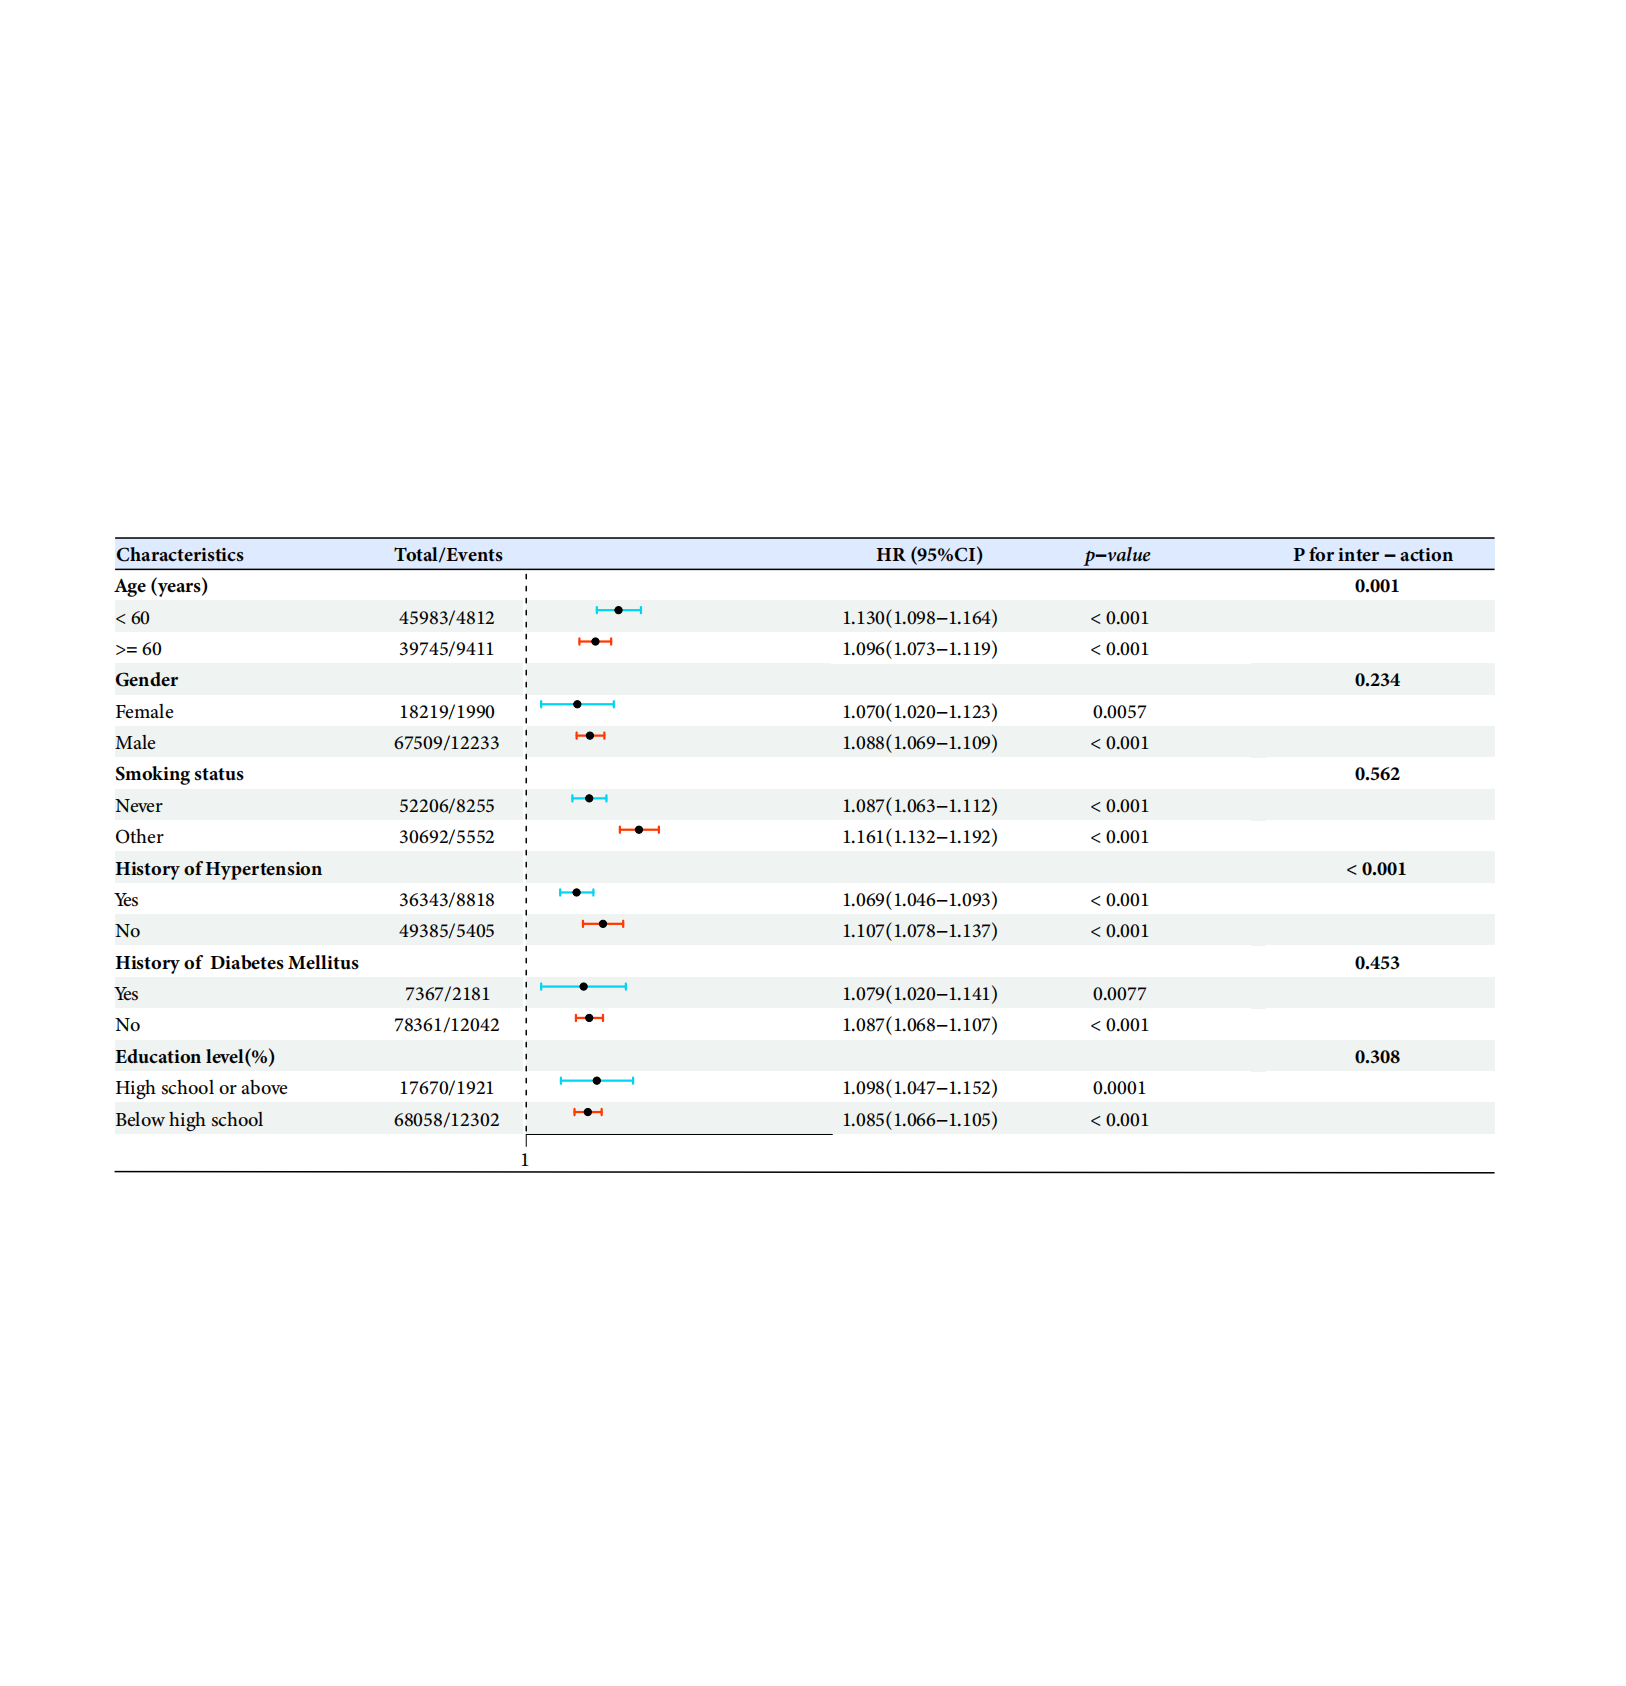


The model was adjusted for Age, Gender, Smoking statues, Drinking statues, Education level, Marital status,eGFR,UA,SBP, Proteinuria,LDL, Physical activity level,Income level,Diabetes,Hypertension,Antihypertensive medications medications,Hypoglycaemic medications,Lipid-lowering drugs. (excluding the variable for subgroup stratification)

**Fig S3. Relationship between CTI and Cardiovascular Disease risk in different sensitivity analyses**

**
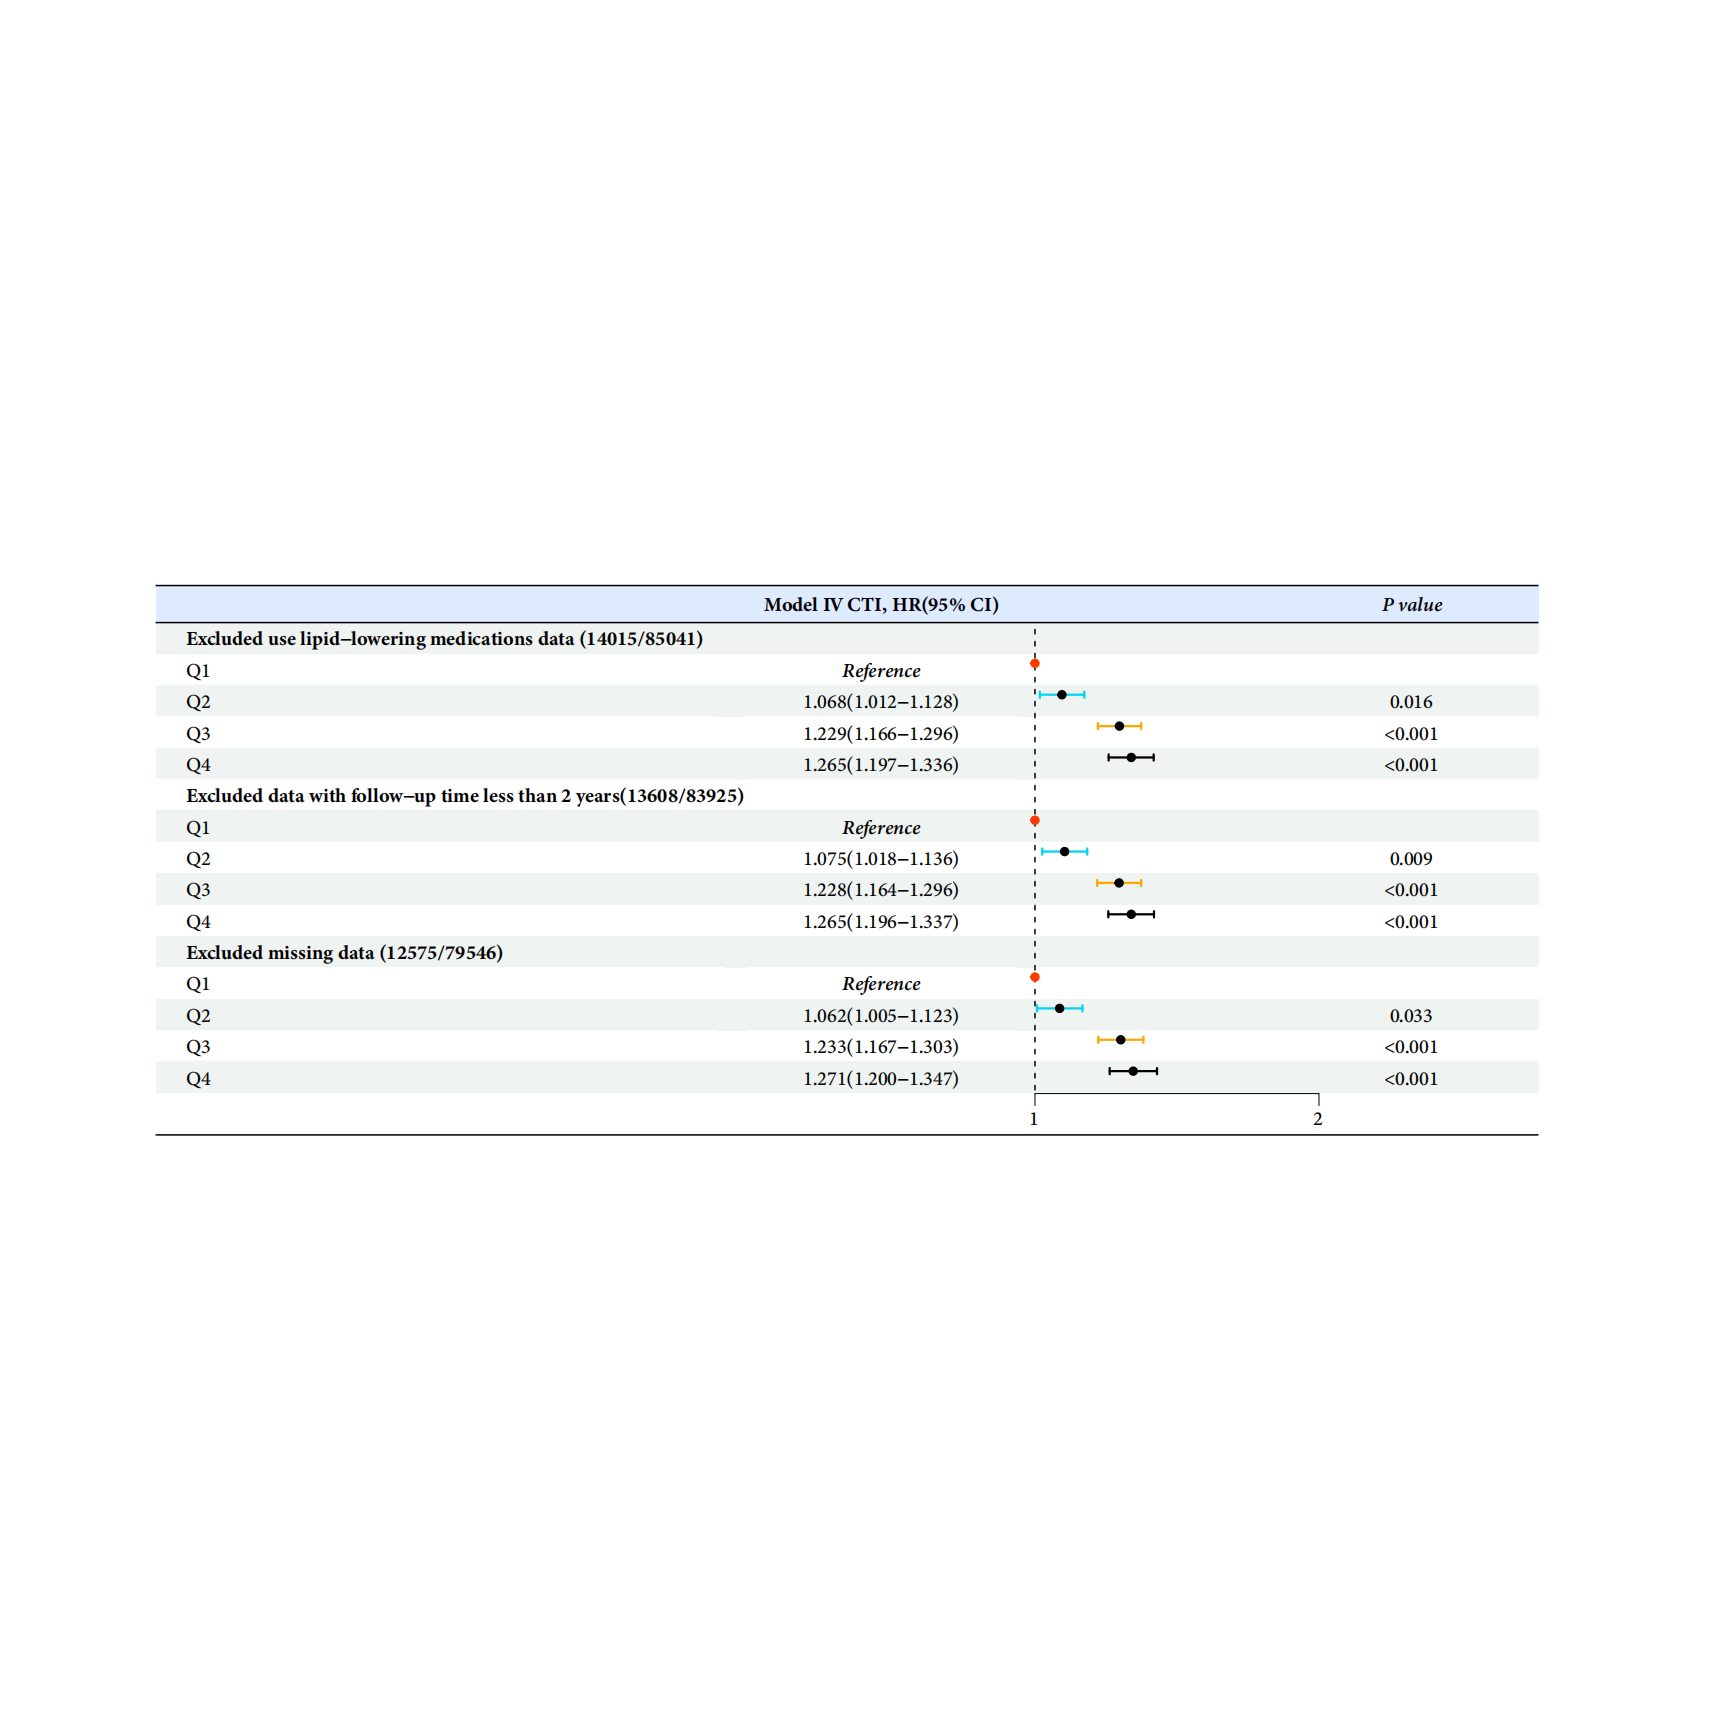
**

The model was adjusted for Age, Gender, Smoking statues, Drinking statues, Education level, Marital status,eGFR,UA,SBP, Proteinuria,LDL, Physical activity level,Income level,Diabetes,Hypertension,Antihypertensive medications medications,Hypoglycaemic medications,Lipid-lowering drugs.

Fig S4. Path diagram of the mediation analysis of WC, FBG, and BMI on the relationship between CTI and cardiovascular disease.

The graphs in (A–C) represented the mediating role of WC, FBG, and BMI, respectively.


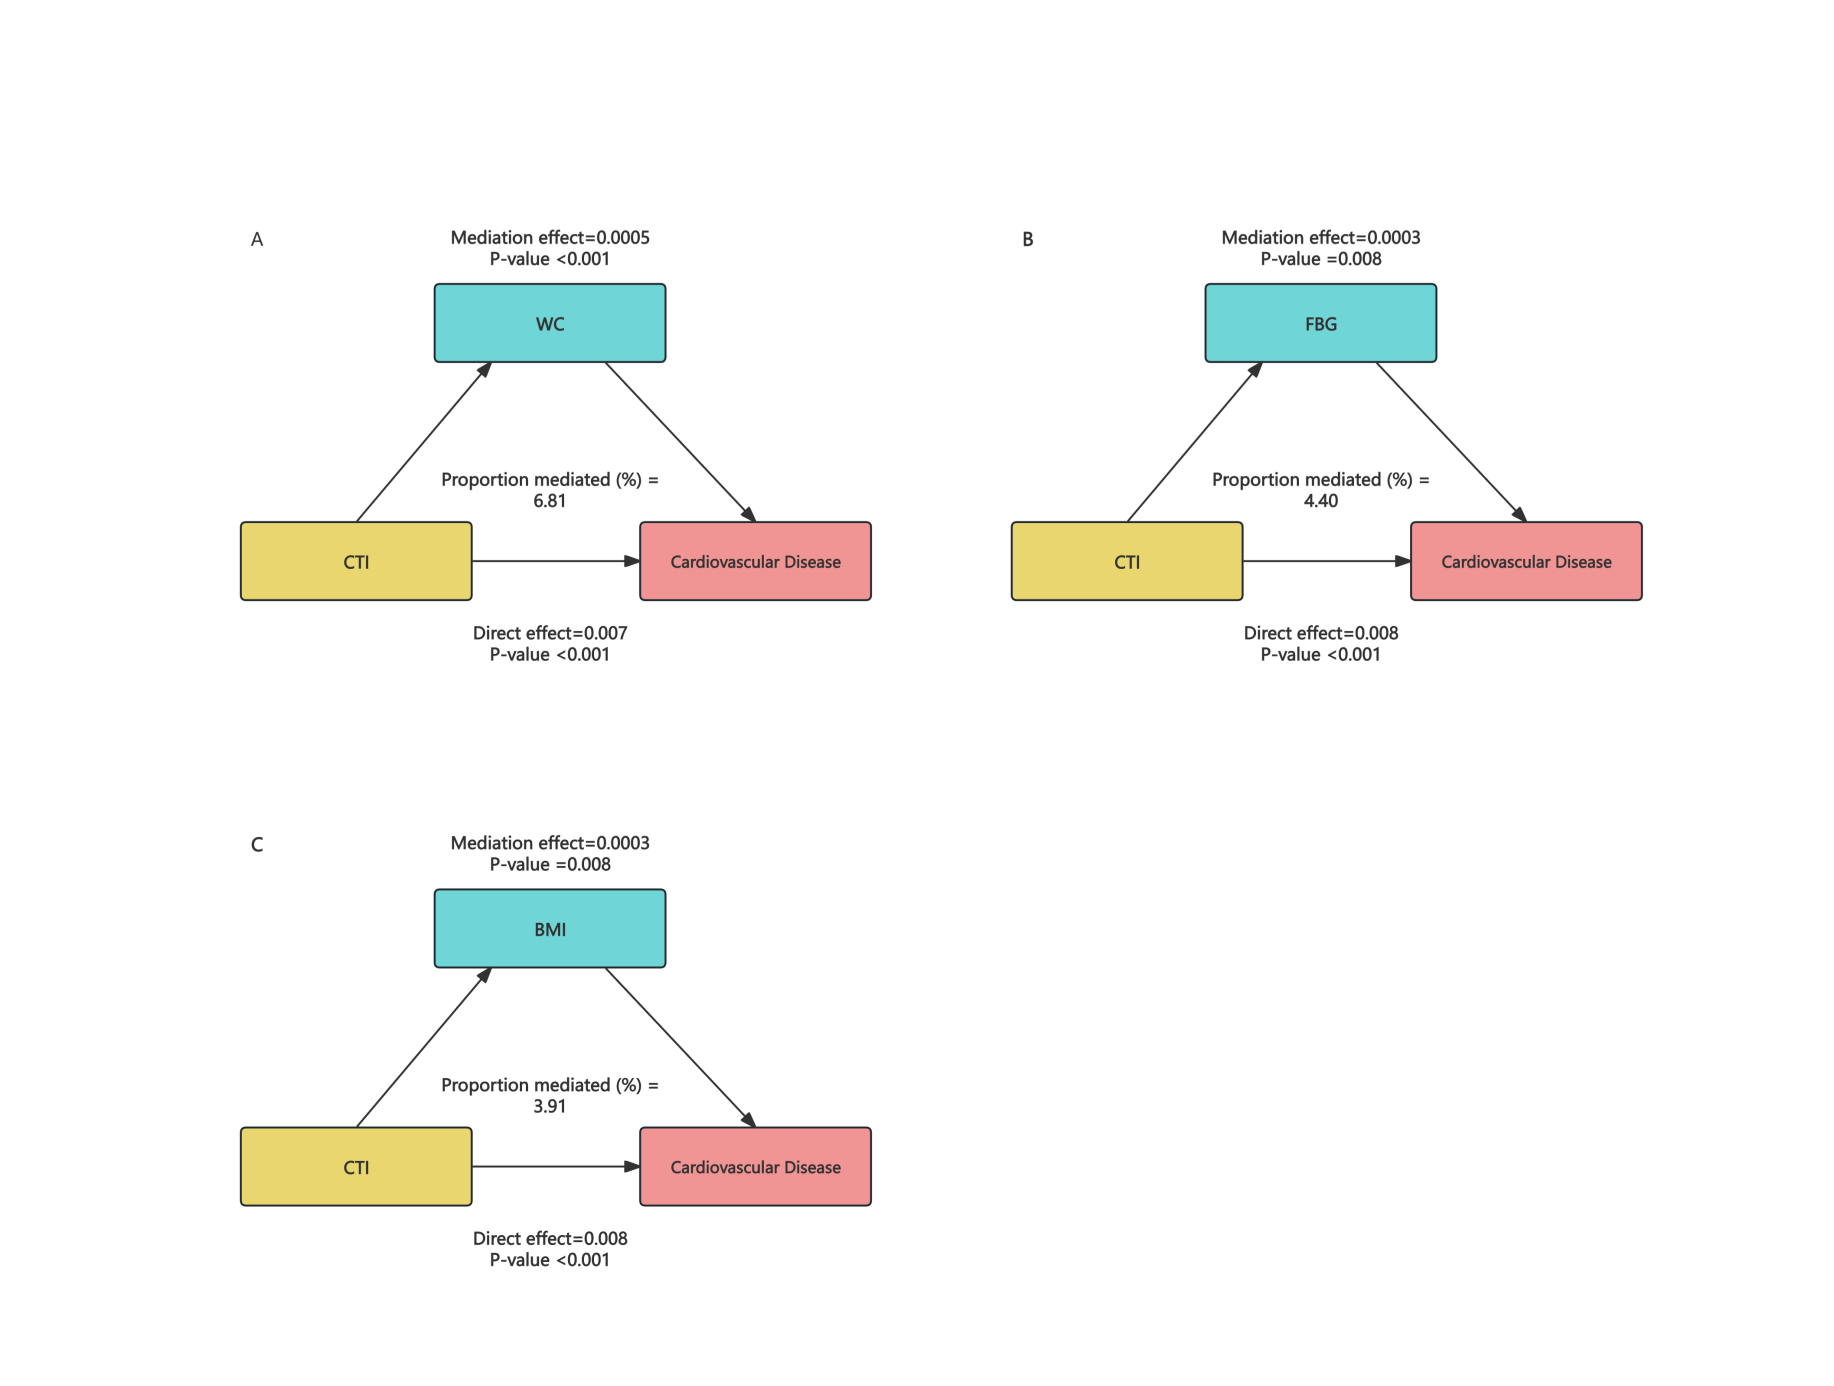


**Table S1.** exclude upper and lower limits of relevant extreme values

| Variable | Lower limit | Upper limit | Exclusion rules  Exclude when below the lower limit or above or equal to the upper limit |
| --- | --- | --- | --- |
| WC | 51 | 190 |
| BMI | 14.277315865 | 48.442906574 |
| SBP | 80 | 242 |
| DBP | 43.3 | 150 |
| FBG | 2.35 | 25 |
| eGFR | 4.99716982 | 668.90766419 |
| HDL | 0.05 | 4.98 |
| TG | 0.07 | 18.81 |
| TC | 0.38 | 17.3 |
| LDL | 0.01 | 12.36 |
| hs-CRO | 0.01 | 184.8 |

| **Table** S3 The results of the  collinearity screening |  |
| --- | --- |
| variable | VIF |
| Sex | 1.43 |
| Age | 1.527 |
| eGFR | 1.195 |
| UA | 2.277 |
| SBP | 2.319 |
| Proteinuria | 1.164 |
| LDL | 1.23 |
| BMI | 1.063 |
| Income | 1.116 |
| FBG | 1.131 |
| WC | 1.225 |
| Physical activity | 1.646 |
| Education level | 1.603 |
| Smoking status | 1.782 |
| Drinking status | 2.599 |
| Marital status | 1.075 |
| Diabetes | 1.288 |
| Hypertension | 1.33 |
| Antihypertensive medications | 1.033 |

**Table S3. 1. Baseline characteristics participants according to the quartile of CTI.**

| **Characteristic** | **Total** | **Q1** | **Q2** | **Q3** | **Q4** | **P-value** |
| --- | --- | --- | --- | --- | --- | --- |
|  | **(N=85728)** | **(N=22061)** | **(N=21624)** | **(N=21220)** | **(N=20823)** |  |
| **Age，years** | 50.48±11.89 | 47.85±12.06 | 50.19±11.85 | 51.34±11.79 | 52.68±11.31 | ＜0.001 |
| **Gender,n(%)** |  |  |  |  |  | ＜0.001 |
| **Female，n (%)** | 18219 (21.25) | 5687 (25.78) | 4411 (20.40) | 4027 (18.98) | 4094 (19.66) |  |
| **Male** | 67509 (78.75) | 16374 (74.22) | 17213 (79.60) | 17193 (81.02) | 16729 (80.34) |  |
| **Education level(%)** |  |  |  |  |  | ＜0.001 |
| **High school or above** | 17670 (20.61) | 5052 (22.90) | 4434 (20.50) | 4254 (20.05) | 3930 (18.87) |  |
| **Less than high school** | 68058 (79.39) | 17009 (77.10) | 17190 (79.50) | 16966 (79.95) | 16893 (81.13) |  |
| **Smoking statues,n (%)** |  |  |  |  |  | ＜0.001 |
| **No** | 52206 (60.90) | 13703 (62.11) | 13120 (60.67) | 12750 (60.08) | 12633 (60.67) |  |
| **Yes** | 33522 (39.10) | 8358 (37.89) | 8504 (39.33) | 8470 (39.92) | 8190 (39.33) |  |
| **Drinking statues,n (%)** |  |  |  |  |  | 0.007 |
| **No** | 53087 (61.92) | 13705 (62.12) | 13385 (61.90) | 13081 (61.64) | 12916 (62.03) |  |
| **Yes** | 32641 (38.08) | 8356 (37.88) | 8239 (38.10) | 8139 (38.36) | 7907 (37.97) |  |
| **CTI** | 8.55±0.98 | 7.34±0.46 | 8.24±0.19 | 8.86±0.19 | 9.82±0.52 |  |
| **FBG, mg/dl** | 5.44±1.60 | 4.96±0.76 | 5.15±0.97 | 5.39±1.29 | 6.32±2.47 | ＜0.001 |
| **eGFR** | 83.00±23.78 | 85.38±22.22 | 82.74±23.33 | 82.05±22.95 | 81.72±26.34 | ＜0.001 |
| **BMI, kg/m2** | 25.05±3.45 | 23.39±3.05 | 24.76±3.18 | 25.62±3.30 | 26.55±3.44 | ＜0.001 |
| **WC, cm** | 86.83±9.90 | 82.42±9.58 | 85.62±9.15 | 88.16±9.19 | 91.39±9.40 | ＜0.001 |
| **TG, mg/dl** | 1.27 (0.89–1.93) | 0.80 (0.62–1.06) | 1.13 (0.89–1.44) | 1.46 (1.12–1.95) | 2.41 (1.68–3.67) | ＜0.001 |
| **TC, mg/dl** | 4.95±1.13 | 4.73±0.94 | 4.91±1.05 | 5.03±1.11 | 5.13±1.35 | ＜0.001 |
| **HDL-c, mg/dl** | 1.55±0.40 | 1.57±0.39 | 1.55±0.38 | 1.54±0.39 | 1.53±0.43 | ＜0.001 |
| **LDL-c, mg/dl** | 2.35±0.91 | 2.30±0.76 | 2.41±0.81 | 2.41±0.93 | 2.27±1.11 | ＜0.001 |
| **CRP, mg/dl** | 2.29±5.33 | 0.32±0.48 | 1.05±1.52 | 2.34±3.16 | 5.61±9.36 | ＜0.001 |
| **UA** | 286.87±82.50 | 266.01±70.83 | 282.08±75.94 | 294.31±83.78 | 306.37±92.97 |  |
| **SBP, mmHg** | 130.06±20.46 | 124.09±18.81 | 128.77±19.89 | 131.90±20.36 | 135.84±20.95 | ＜0.001 |
| **DBP, mmHg** | 83.34±11.62 | 80.17±10.95 | 82.75±11.30 | 84.38±11.56 | 86.25±11.83 | ＜0.001 |
| **Lipid‐lowering medications, *n* (%)** |  |  |  |  |  | ＜0.001 |
| **No** | 85041 (99.20) | 21986 (99.66) | 21499 (99.42) | 21023 (99.07) | 20533 (98.61) |  |
| **Yes** | 687 (0.80) | 75 (0.34) | 125 (0.58) | 197 (0.93) | 290 (1.39) |  |
| **Antihypertensive medications, *n* (%)** |  |  |  |  |  | ＜0.001 |
| **No** | 77398 (90.28) | 21019 (95.28) | 19854 (91.81) | 18824 (88.71) | 17701 (85.01) |  |
| **Yes** | 8330 (9.72) | 1042 (4.72) | 1770 (8.19) | 2396 (11.29) | 3122 (14.99) |  |
| **Hypoglycaemic medications, *n* (%)** |  |  |  |  |  | ＜0.001 |
| **No** | 83971 (97.95) | 21922 (99.37) | 21394 (98.94) | 20831 (98.17) | 19824 (95.20) |  |
| **Yes** | 1757 (2.05) | 139 (0.63) | 230 (1.06) | 389 (1.83) | 999 (4.80) |  |
| **Hypertension, n (%)** |  |  |  |  |  | ＜0.001 |
| **No** | 49385 (57.61) | 15785 (71.55) | 13094 (60.55) | 11279 (53.15) | 9227 (44.31) |  |
| **Yes** | 36343 (42.39) | 6276 (28.45) | 8530 (39.45) | 9941 (46.85) | 11596 (55.69) |  |
| **Diabetes, n (%)** |  |  |  |  |  | ＜0.001 |
| **No** | 78361 (91.41) | 21658 (98.17) | 20799 (96.18) | 19645 (92.58) | 16259 (78.08) |  |
| **Yes** | 7367 (8.59) | 403 (1.83) | 825 (3.82) | 1575 (7.42) | 4564 (21.92) |  |
| **CKM stage** |  |  |  |  |  | ＜0.001 |
| **0** | 3642 (4.25) | 2368 (10.73) | 850 (3.93) | 358 (1.69) | 66 (0.32) |  |
| **1** | 23301 (27.18) | 10674 (48.38) | 7539 (34.86) | 4062 (19.14) | 1026 (4.93) |  |
| **2** | 48563 (56.65) | 7460 (33.82) | 11037 (51.04) | 14074 (66.32) | 15992 (76.80) |  |
| **3** | 10222 (11.92) | 1559 (7.07) | 2198 (10.16) | 2726 (12.85) | 3739 (17.96) |  |
| **CVD，n (%)** |  |  |  |  |  | ＜0.001 |
| **No** | 71505 (83.41) | 19646 (89.05) | 18521 (85.65) | 17326 (81.65) | 16012 (76.90) |  |
| **Yes** | 14223 (16.59) | 2415 (10.95) | 3103 (14.35) | 3894 (18.35) | 4811 (23.10) |  |
